# Supplementary material for: Critical assessment of anti-amyloid-β monoclonal antibodies effects in Alzheimer’s disease: a systematic review and meta-analysis highlighting target engagement and clinical meaningfulness
Source: PubMed Central journal article supplement (PMC11520896; doi:10.1038/s41598-024-75204-8), 2024-10-28
Supplement: 41598_2024_75204_MOESM1_ESM.pdf [file 41598_2024_75204_MOESM1_ESM.pdf]

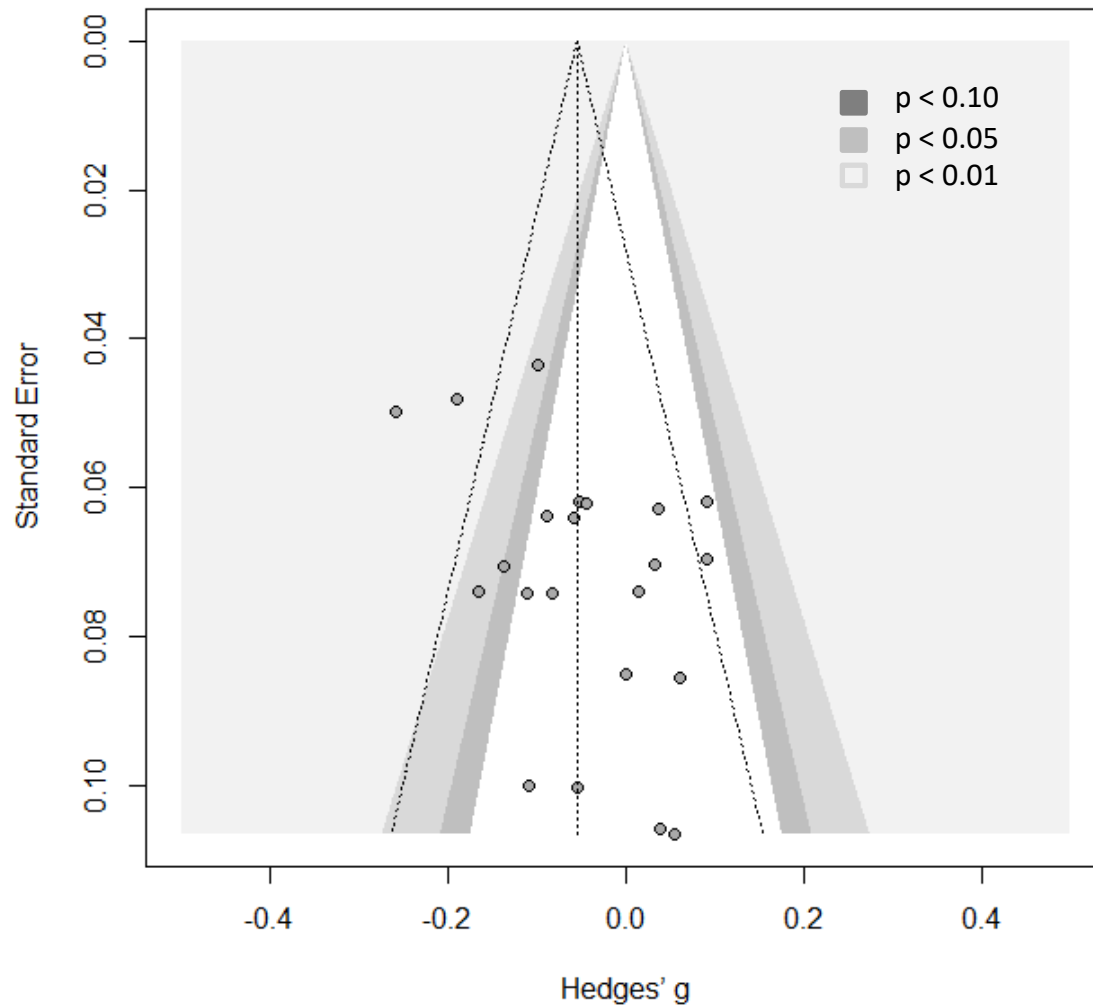

**Figure S1.** Funnel Plot for assessment of publications bias based on primary outcome (CDR-SB) effect sizes

(a)

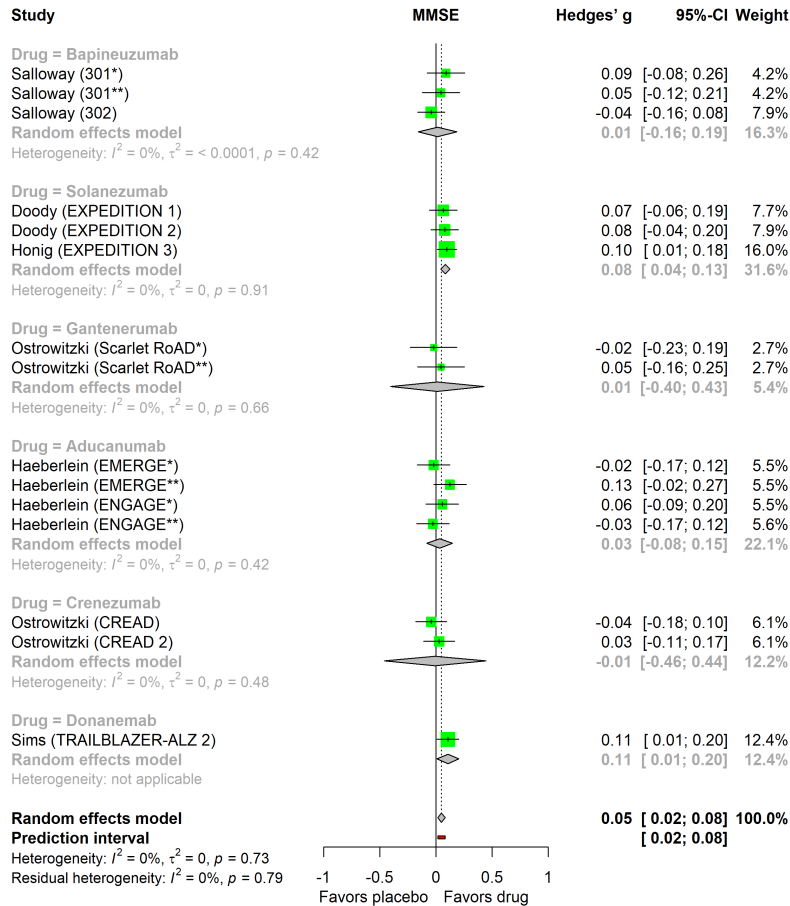

(b)

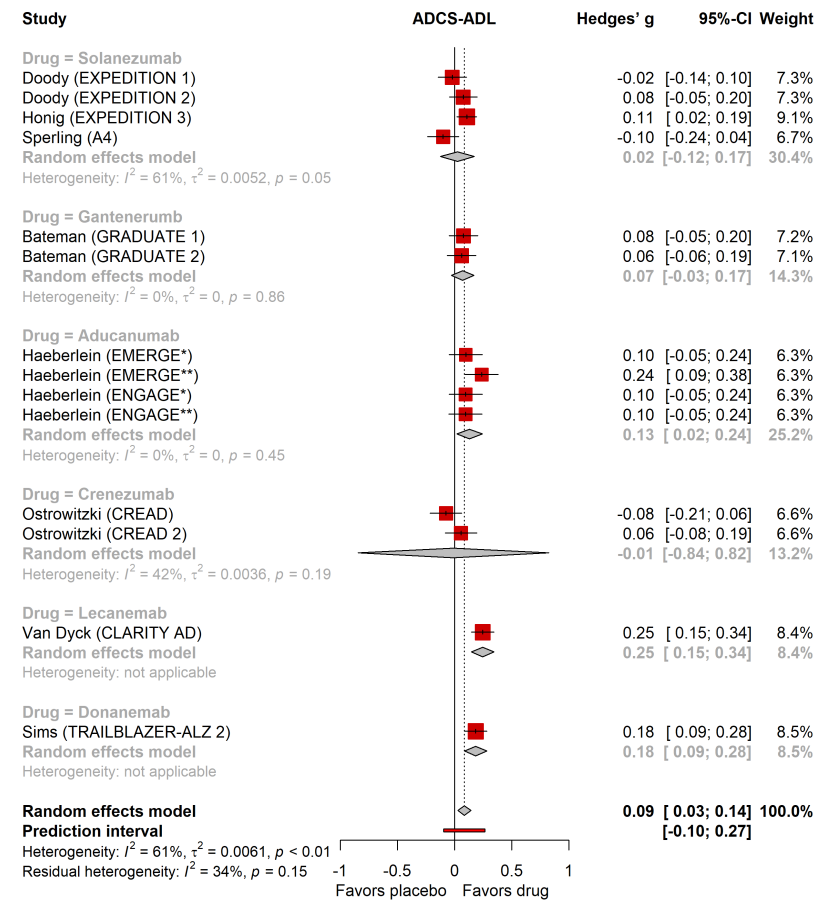

**Figure S2.** Forest plots of (a) Mini Mental State Examination (MMSE) and (b) Alzheimer's Disease Cooperative Study - Activities of Daily Living (ADCS-ADL) meta-analyses with subgroup analyses by drug

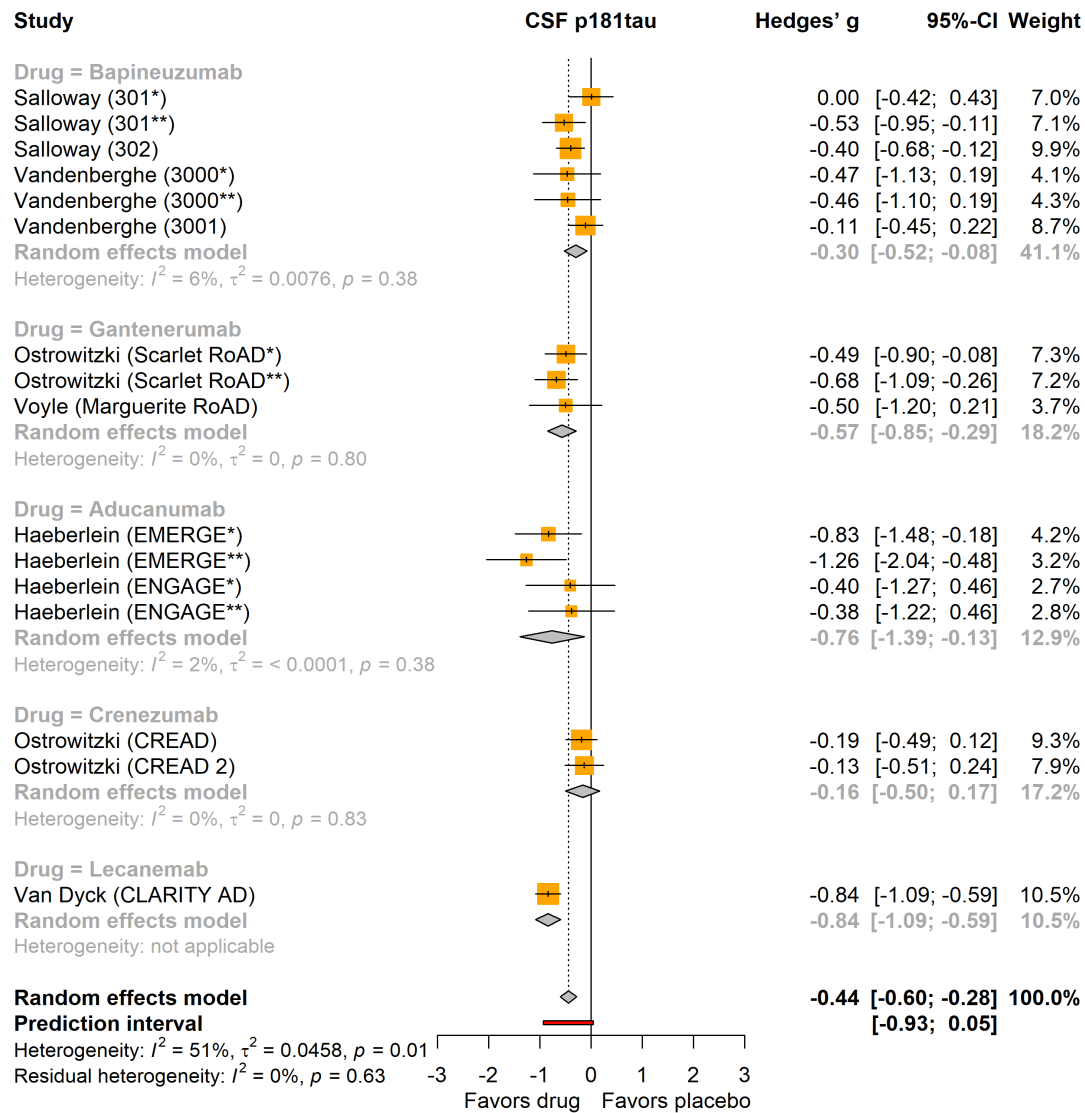

**Figure S3.** Forest plot of CSF p181-tau meta-analysis with subgroup analysis by drug

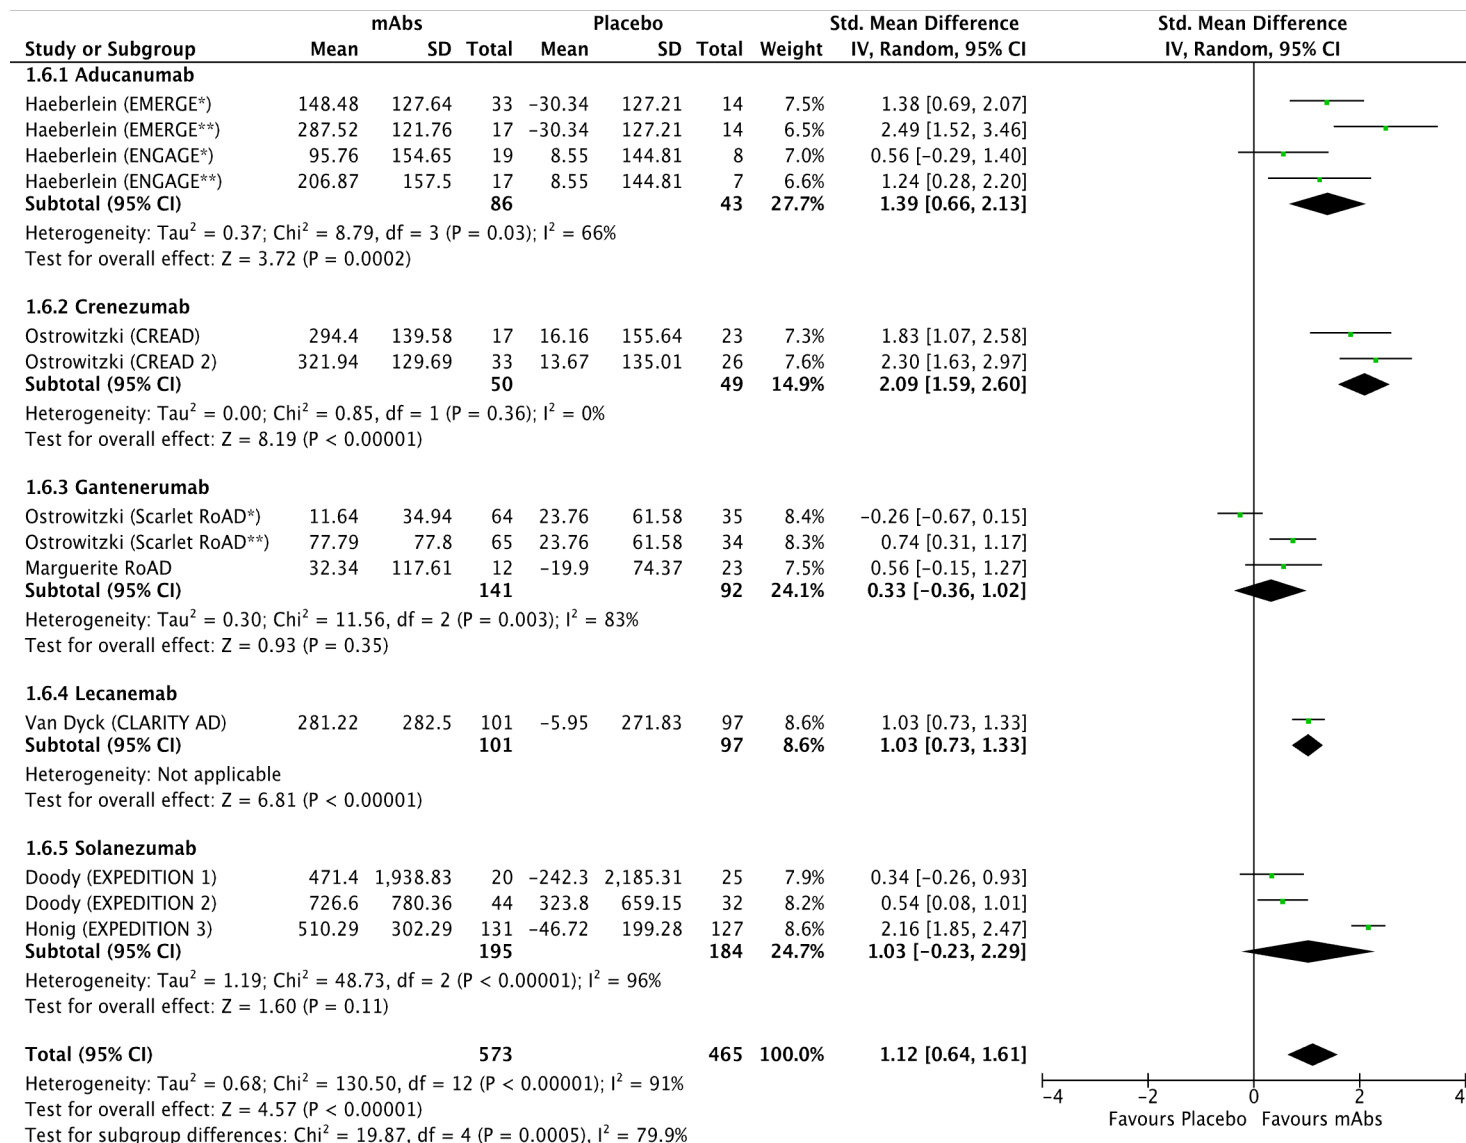

**Figure S4.** Forest plot of CSF A $\beta_{42}$  meta-analysis with subgroup analysis by drug



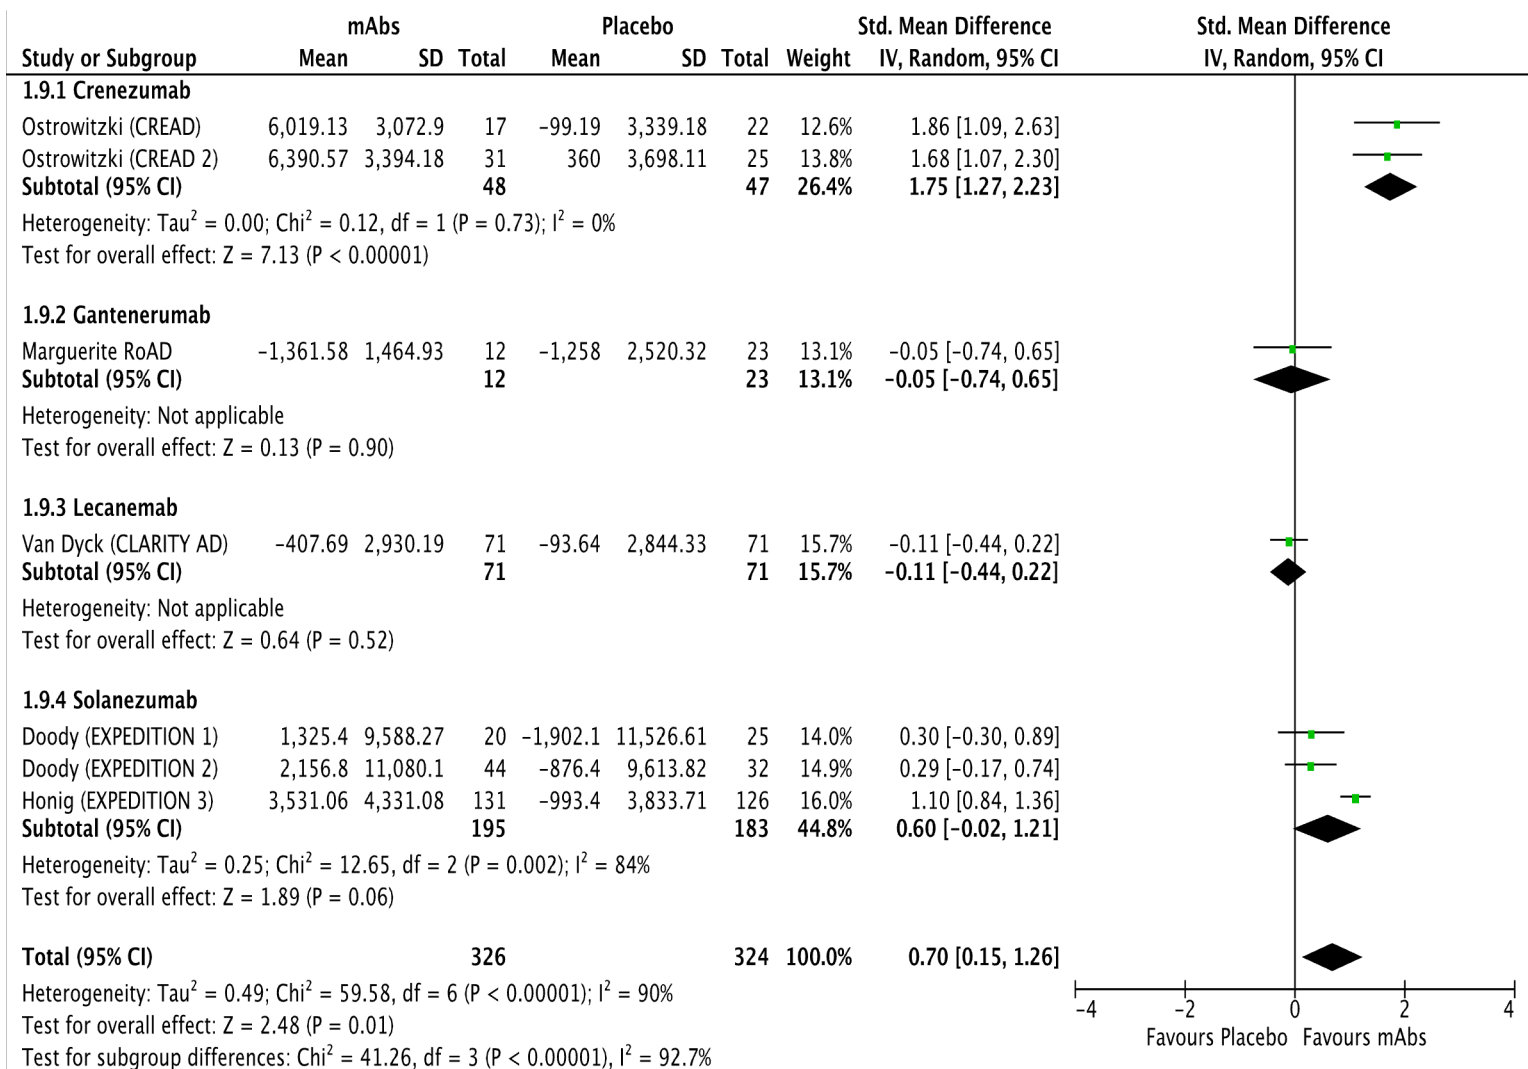

**Figure S5.** Forest plot of CSF A $\beta_{40}$  meta-analysis with subgroup analysis by drug

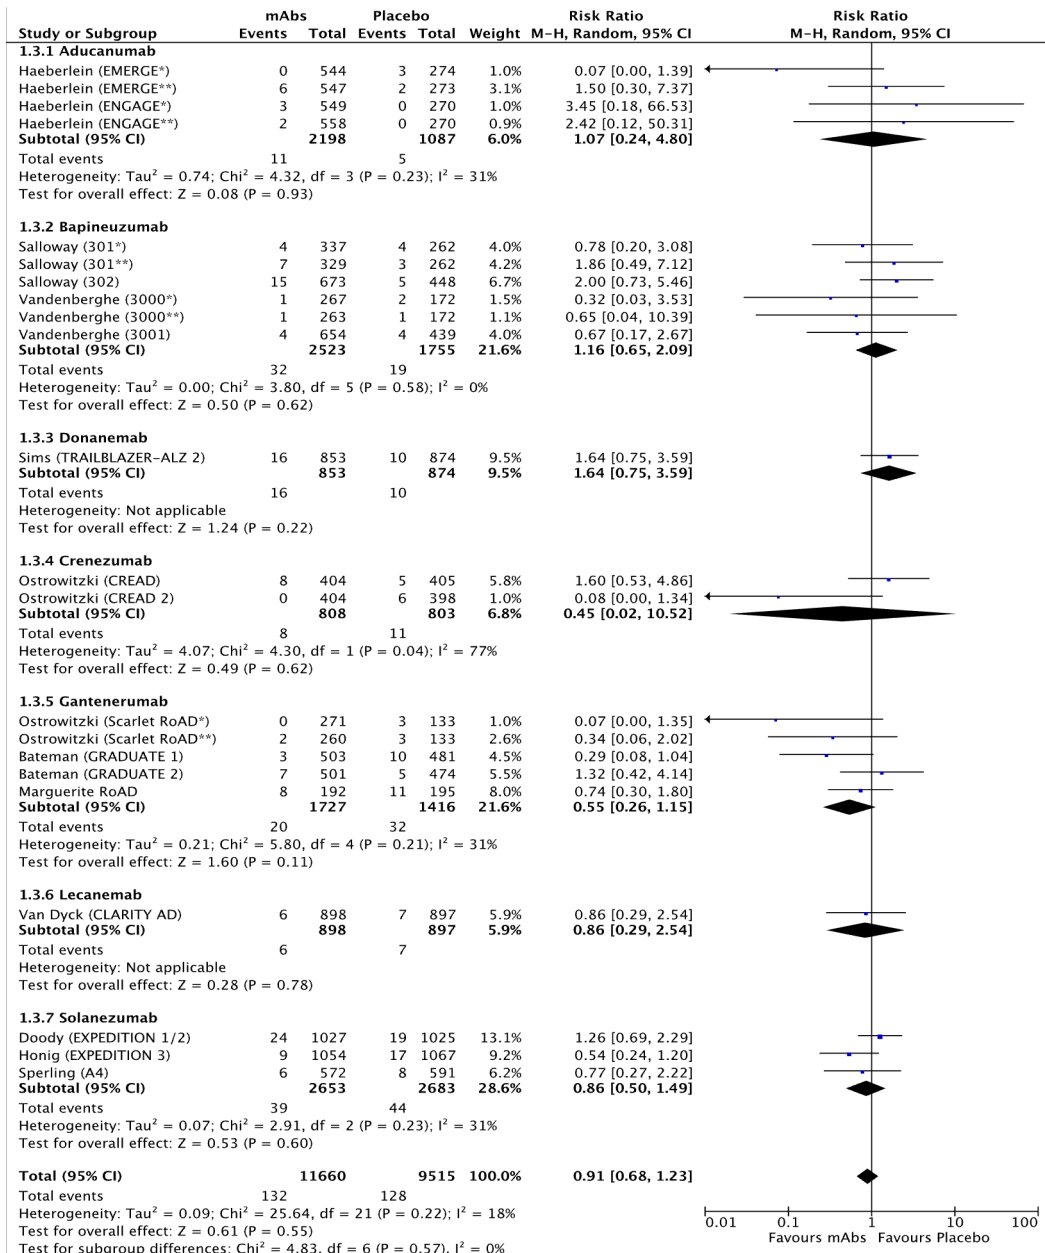

**Figure S6.** Forest plot of all-cause mortality meta-analysis with subgroup analysis by drug

(a)

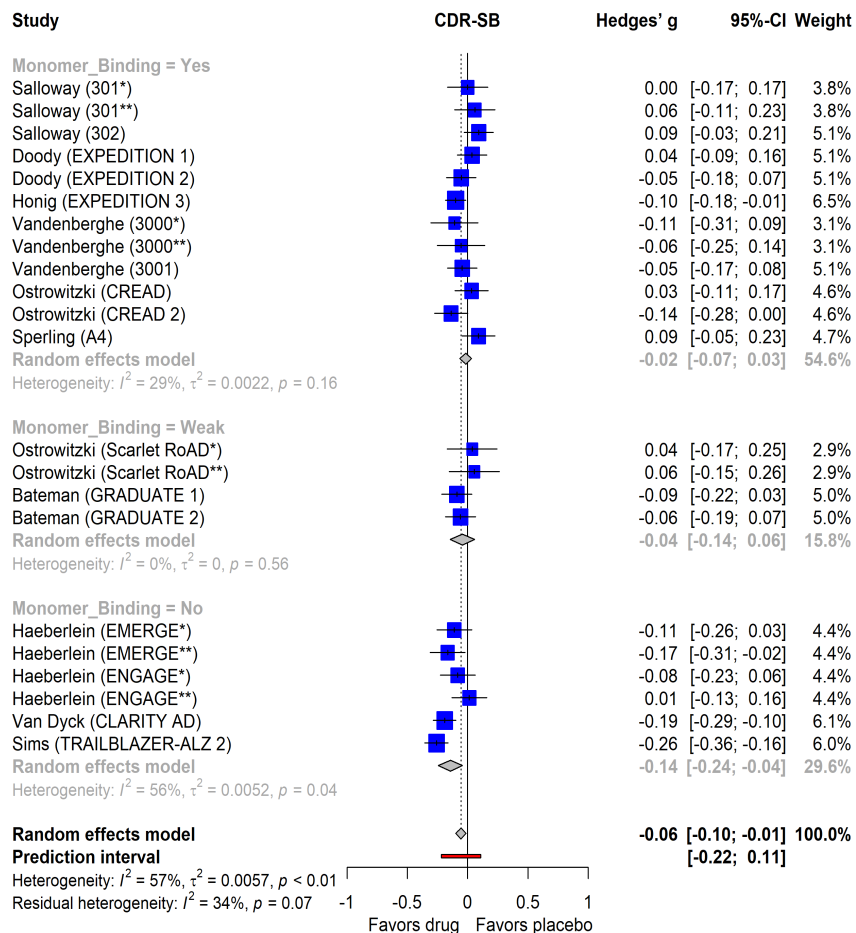

(b)

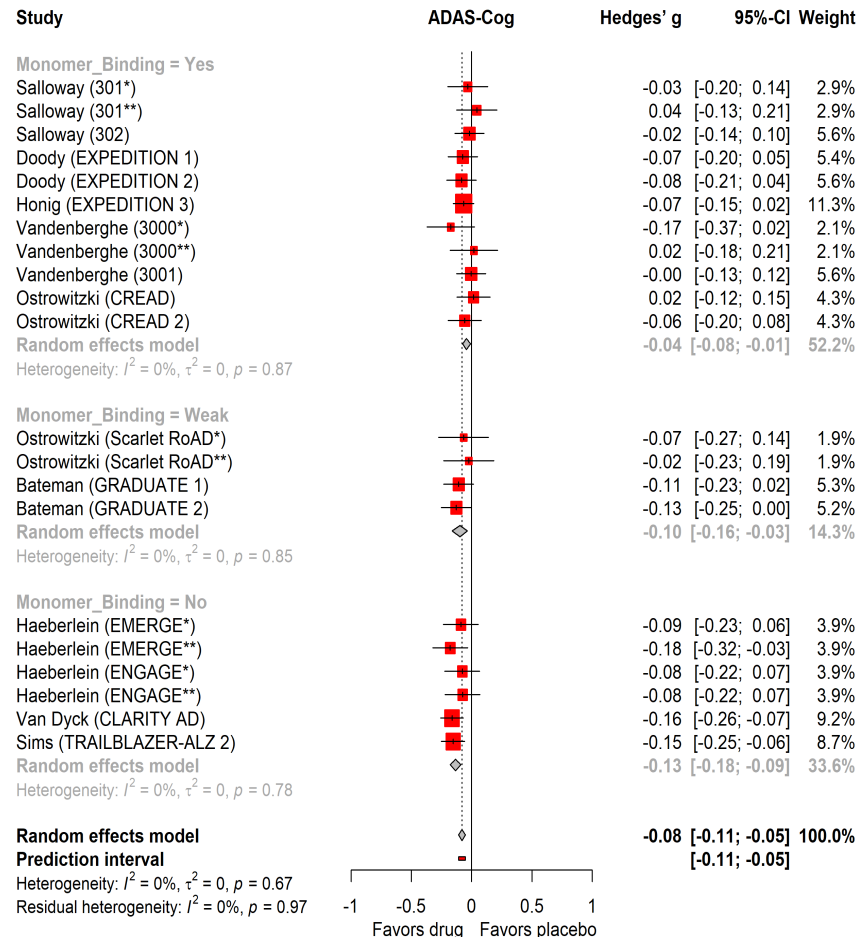

**Figure S7.** Forest plots of (a) Clinical Dementia Rating Scale Sum of Boxes (CDR-SB) and (b) AD Assessment Scale–Cognitive Subscale (ADAS-Cog) meta-analyses with with subgroup analyses by binding affinity to A $\beta$  monomers

(a)

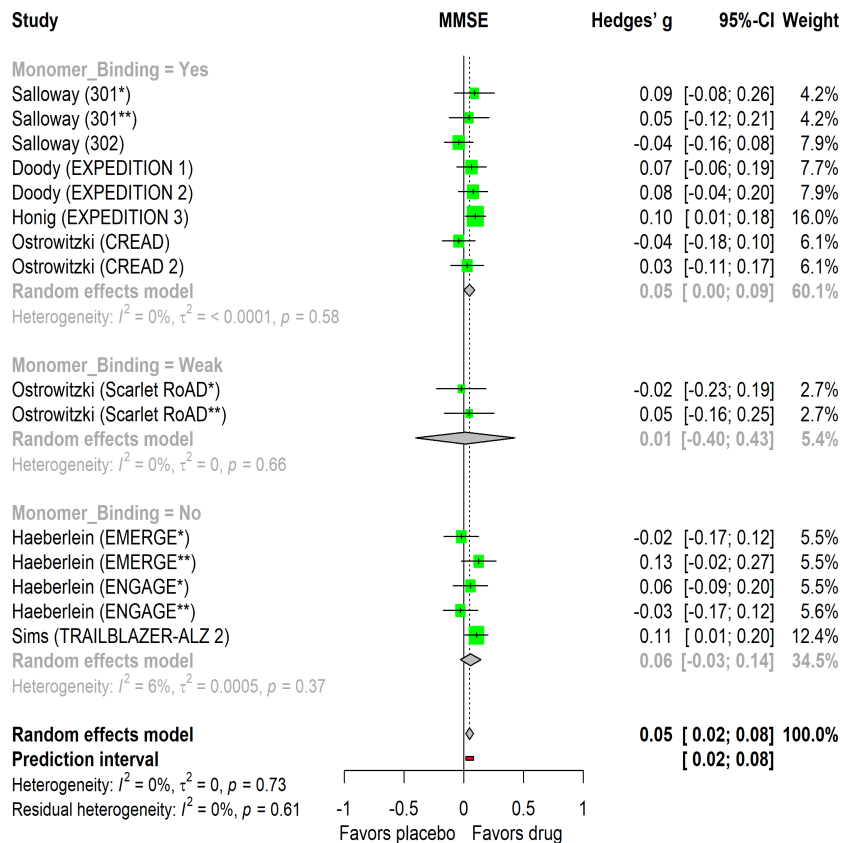

(b)

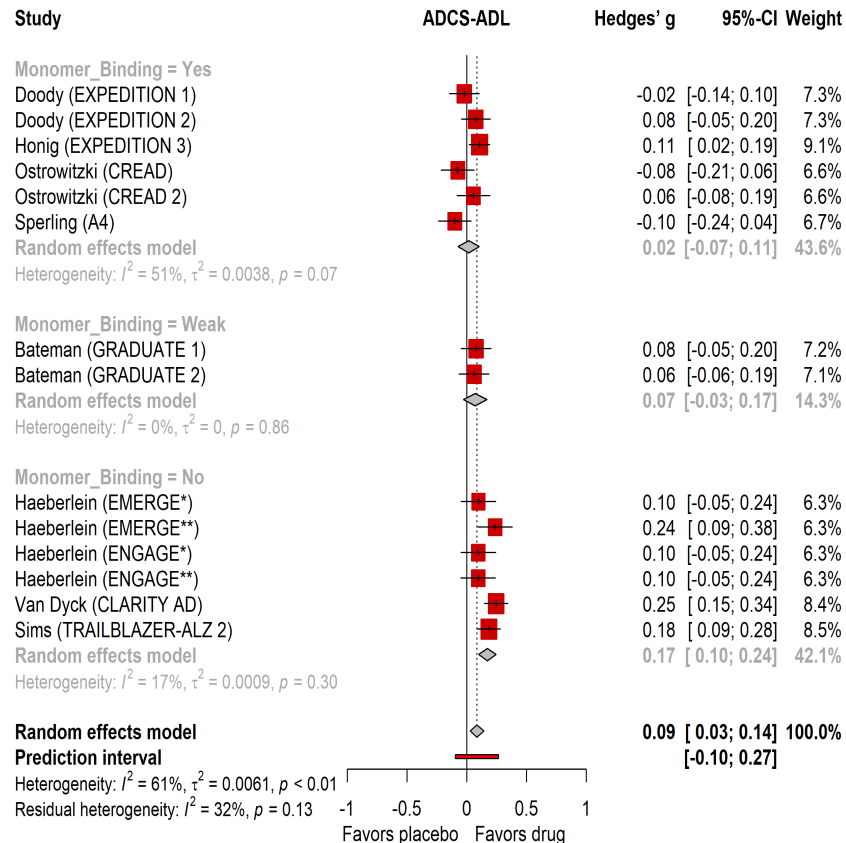

**Figure S8.** Forest plots of (a) Mini Mental State Examination (MMSE) and (b) Alzheimer's Disease Cooperative Study - Activities of Daily Living (ADCS-ADL) meta-analyses with subgroup analyses by binding affinity to A $\beta$  monomers

(a)

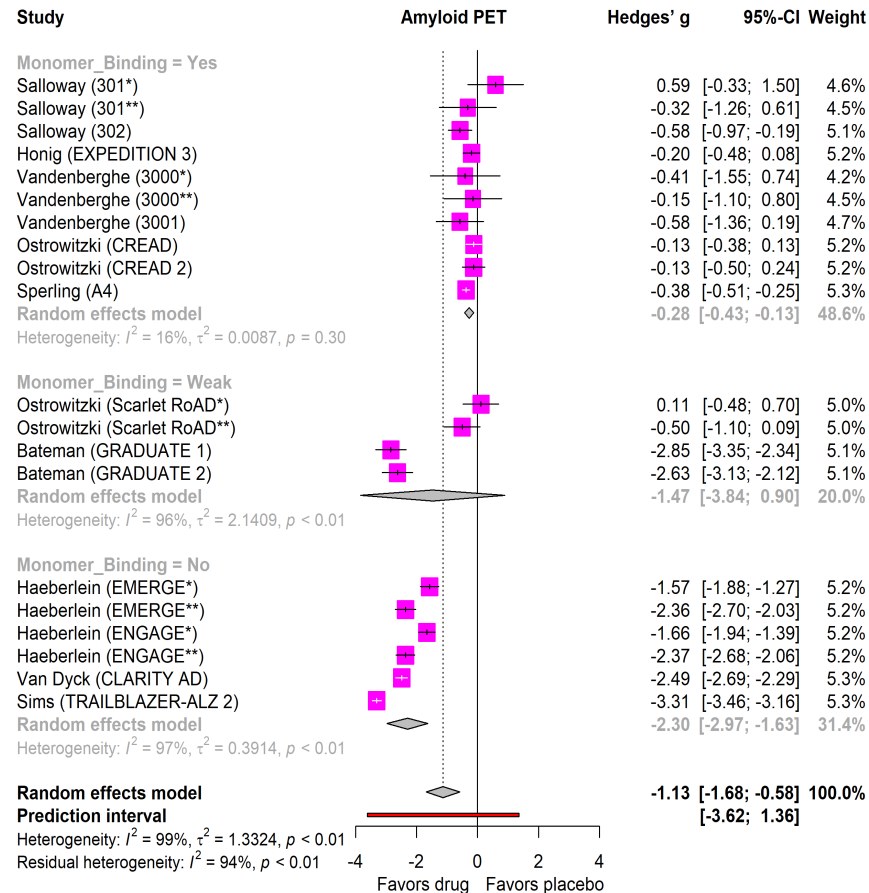

(b)

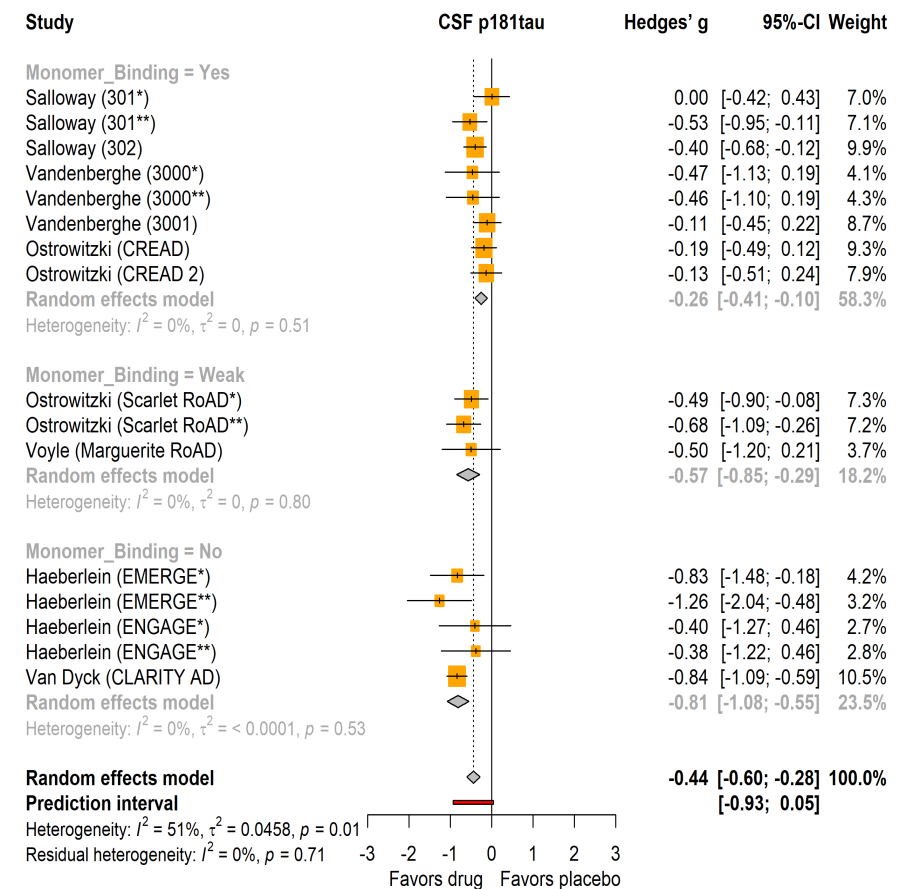

**Figure S9.** Forest plots of (a) Amyloid PET and (b) CSF p181-tau meta-analyses with subgroup analyses by binding affinity to A $\beta$  monomers

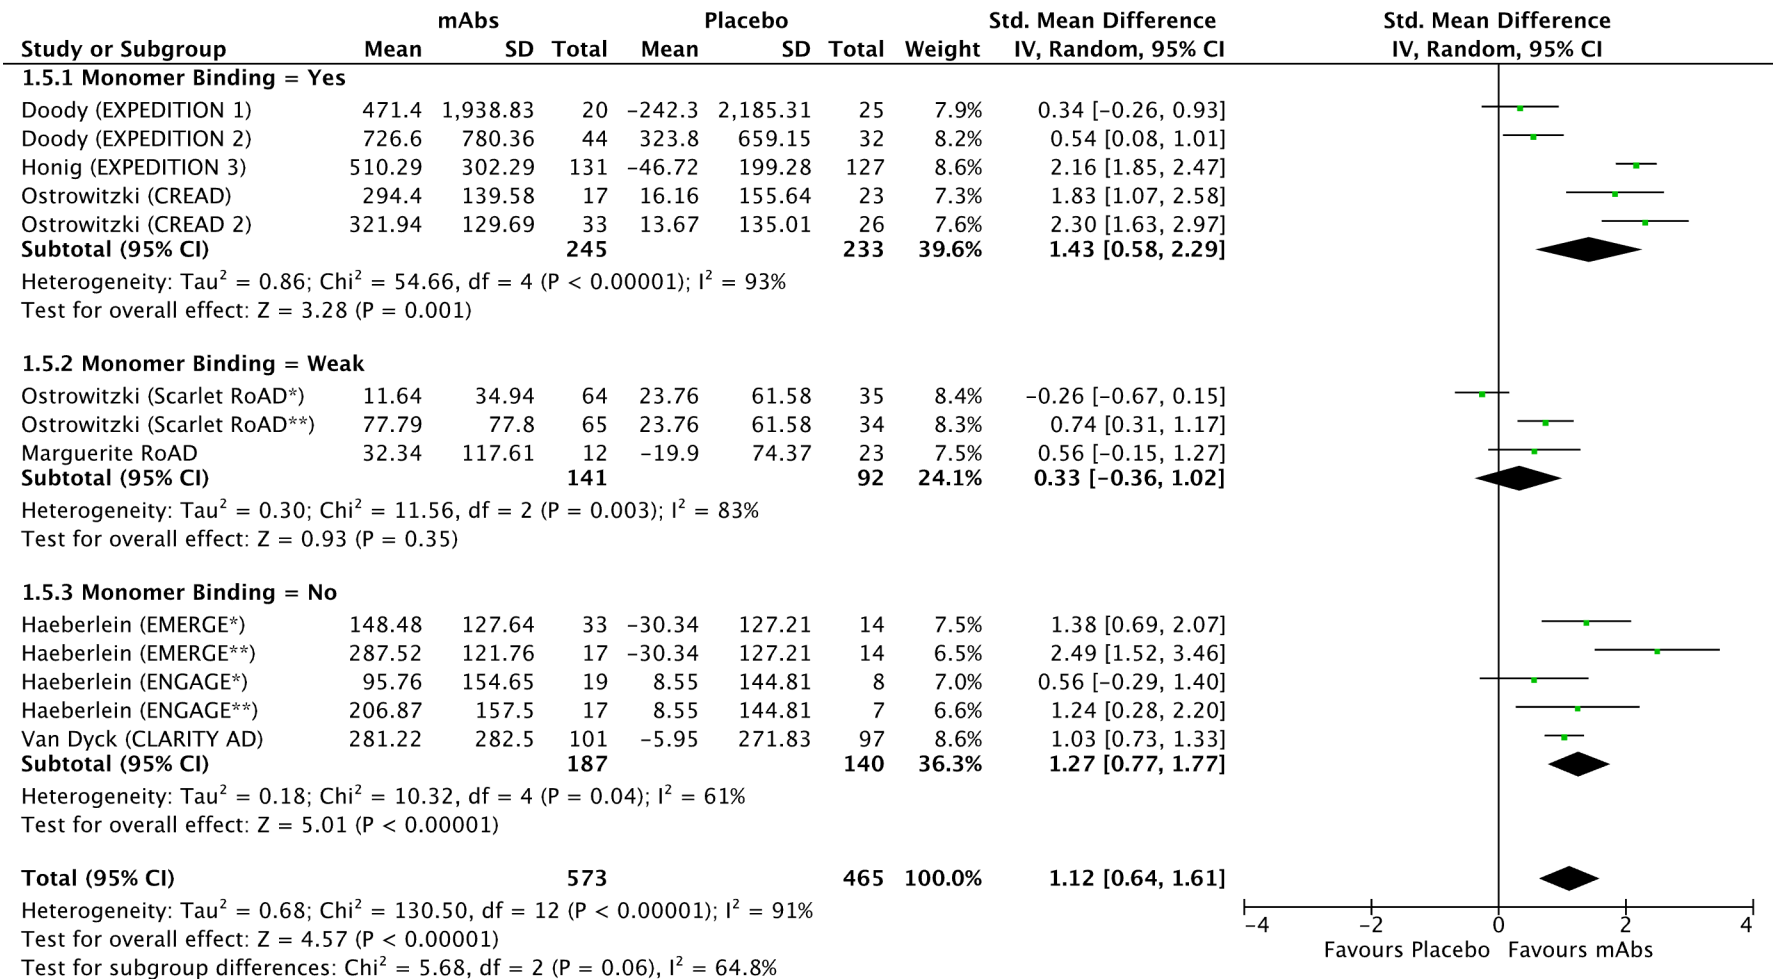

**Figure S10.** Forest plot of CSF Aβ<sub>42</sub> meta-analysis with subgroup analysis by monomer binding affinity

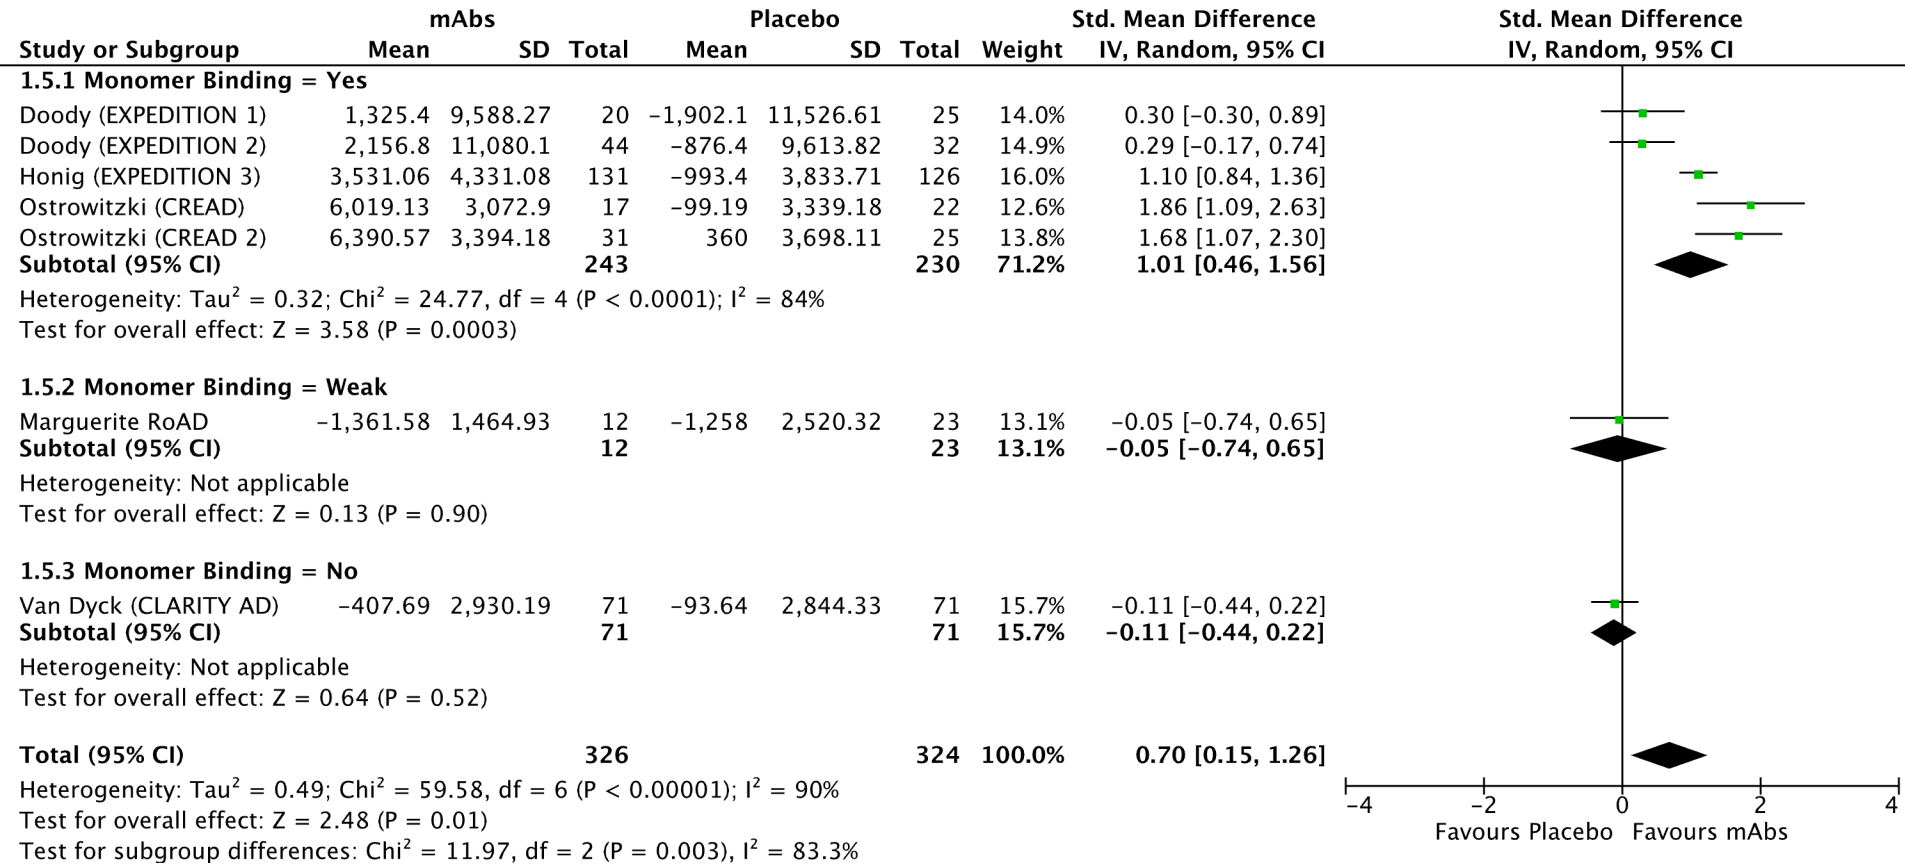

**Figure S11.** Forest plot of CSF A $\beta_{40}$  meta-analysis with subgroup analysis by monomer binding affinity



(a)

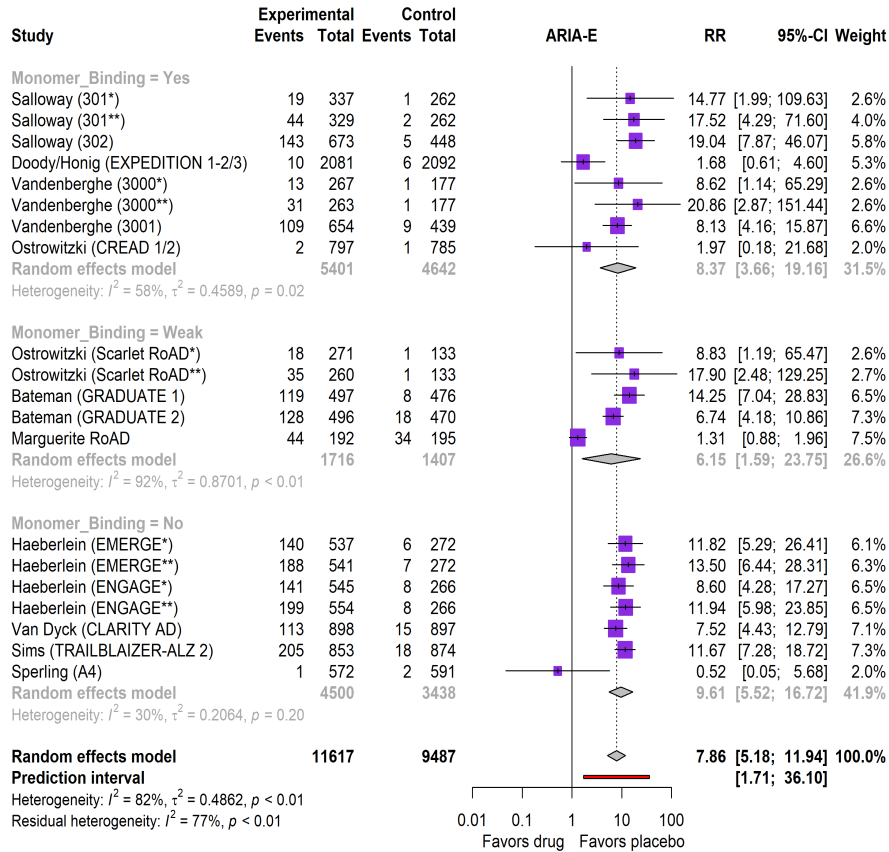

(b)

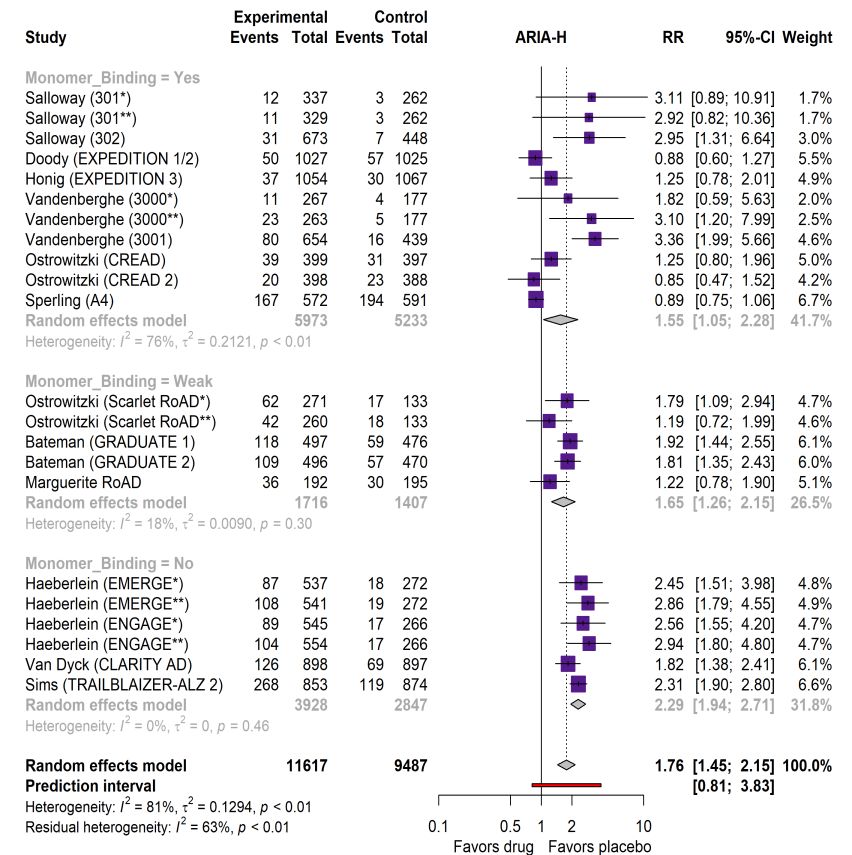

**Figure S12.** Forest plots of (a) Amyloid-Related Imaging Abnormalities with Edema/Effusion (ARIA-E) and (b) ARIA with microhemorrhages or superficial siderosis (ARIA-H) with subgroup analyses by binding affinity to A $\beta$  monomers



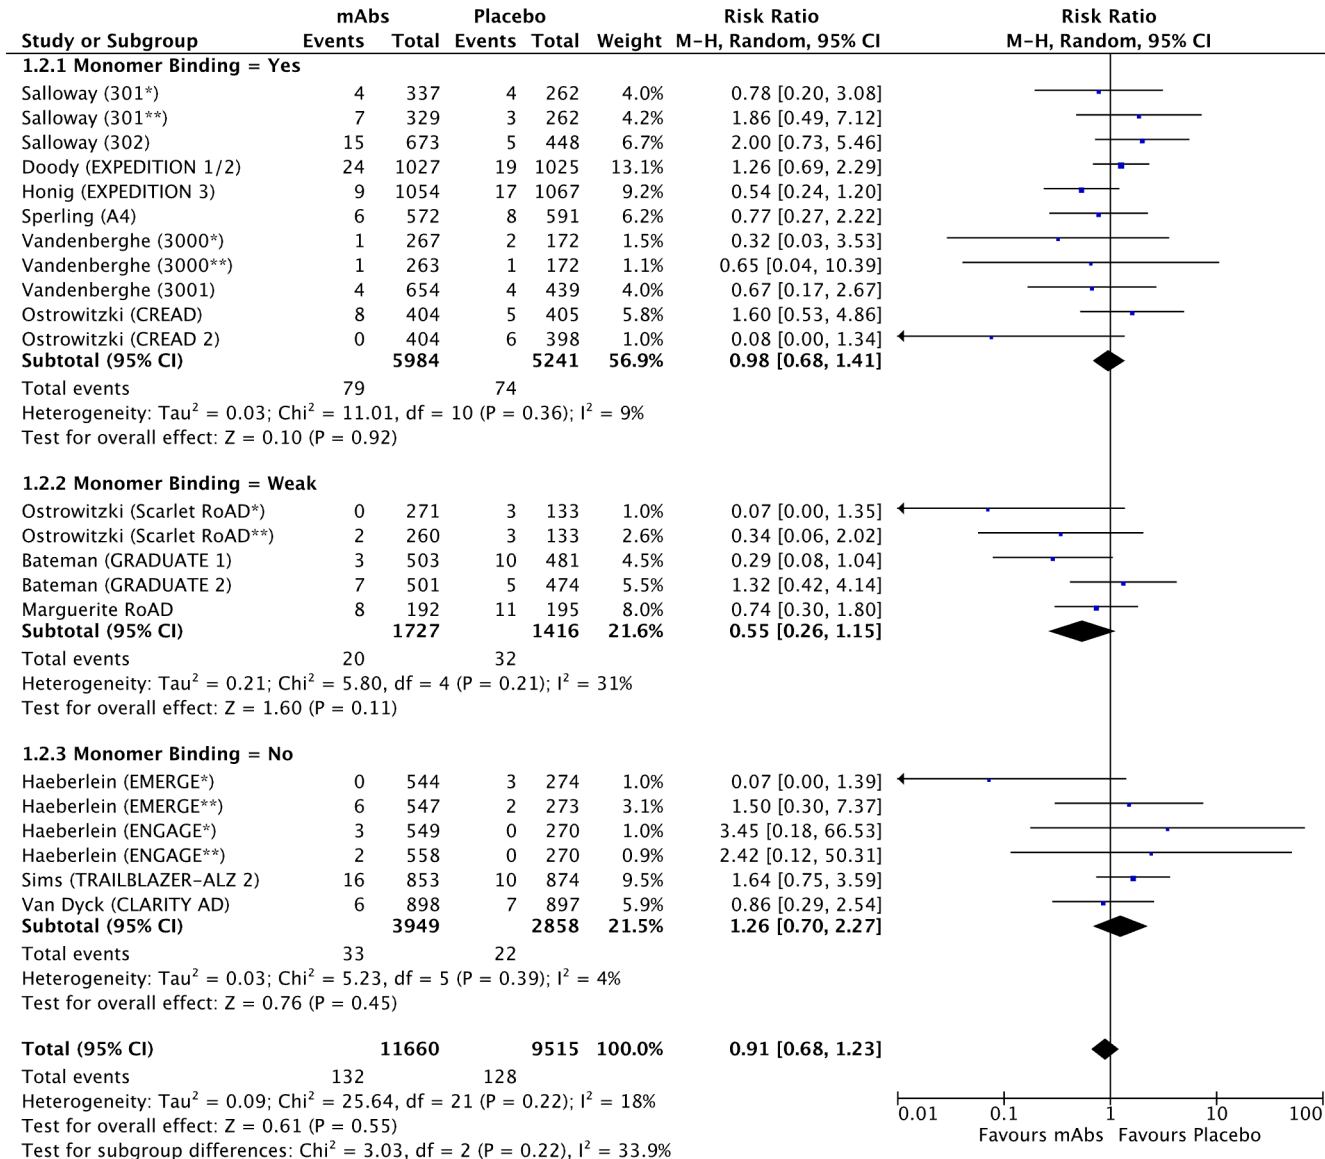

**Figure S13.** Forest plot of all-cause mortality meta-analysis with subgroup analysis by monomer binding affinity

(a)

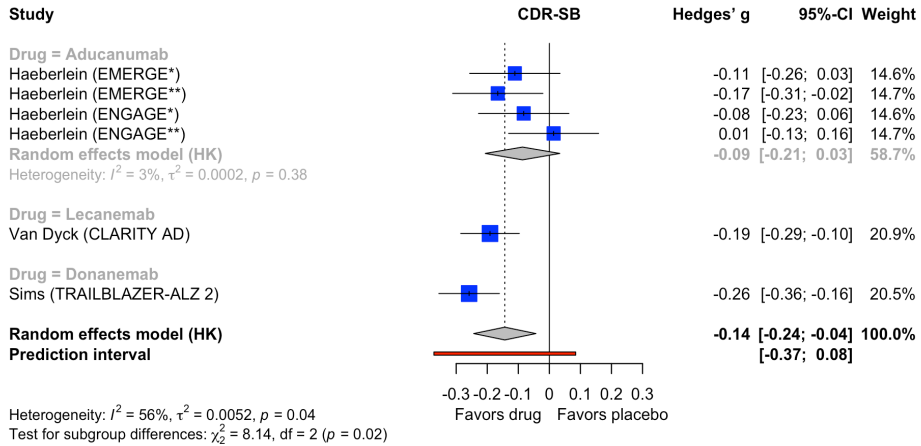

(b)

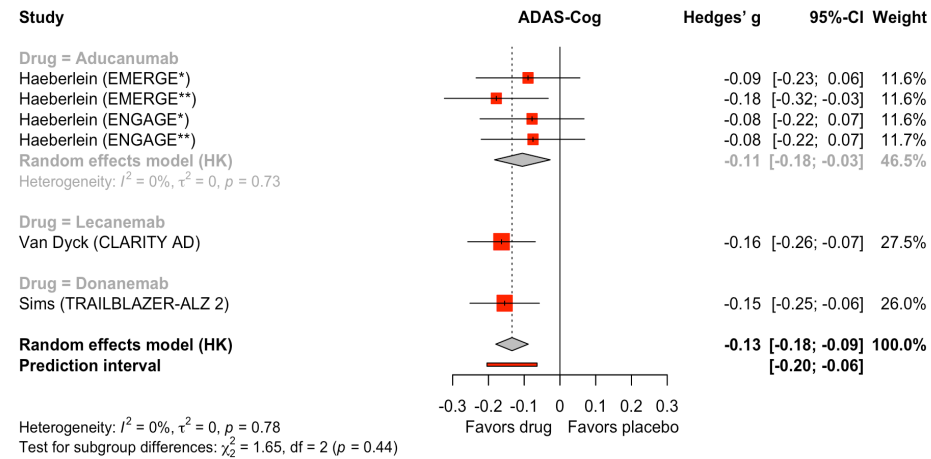

(c)

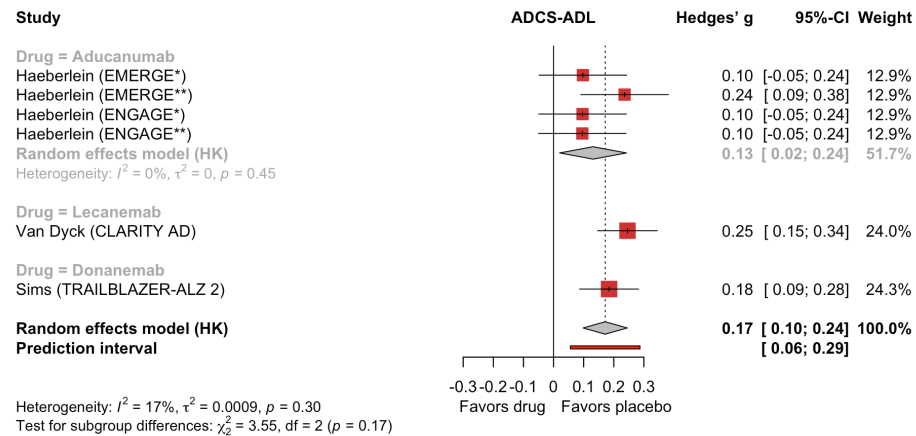

(d)

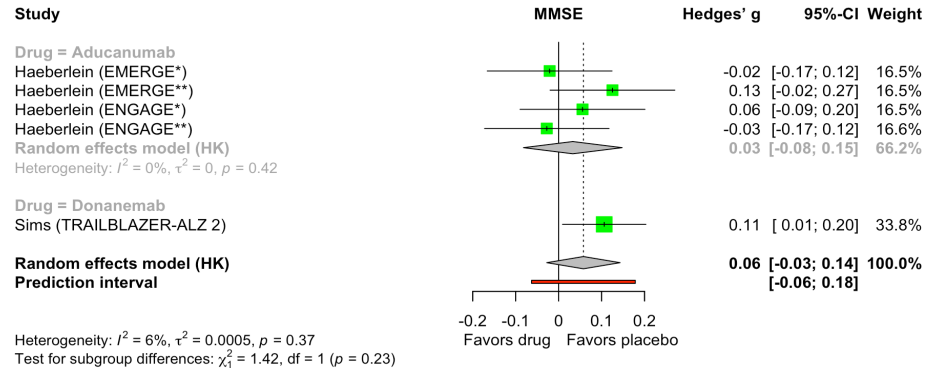

**Figure S14.** Forest plots of (a) Clinical Dementia Rating Scale Sum of Boxes (CDR-SB), (b) AD Assessment Scale–Cognitive Subscale (ADAS-Cog), (c) AD Cooperative Study – Activities of Daily Living (ADCS-ADL), (d) Mini Mental Examination State (MMSE) meta-analyses of FDA-approved monoclonal antibodies only with subgroup analyses by drug

(a)

(b)

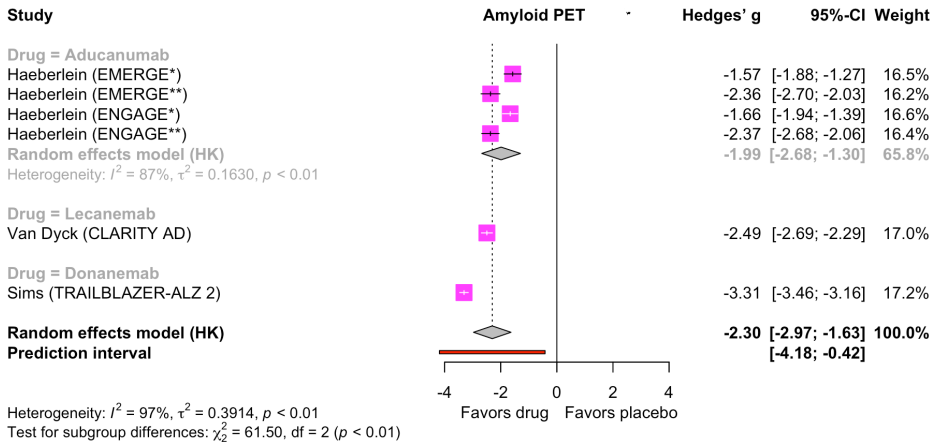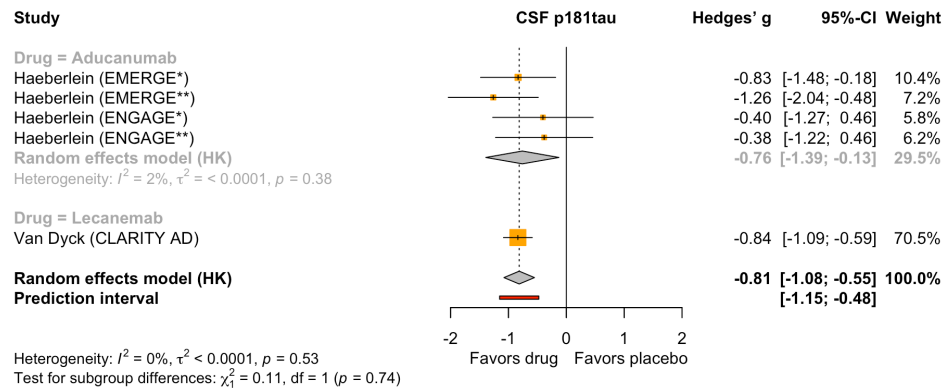

(c)

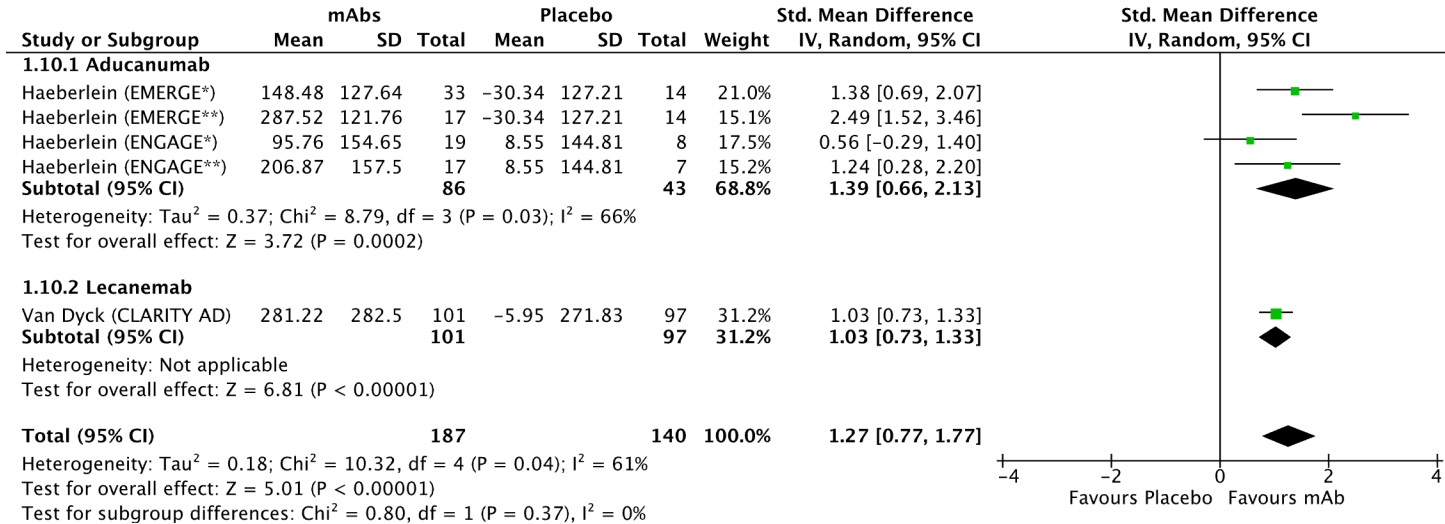

**Figure S15.** Forest plots of (a) Amyloid PET, (b) CSF p181-tau, (c) CSF  $A\beta_{42}$  meta-analyses of FDA-approved monoclonal antibodies only with subgroup analyses by drug

(a)

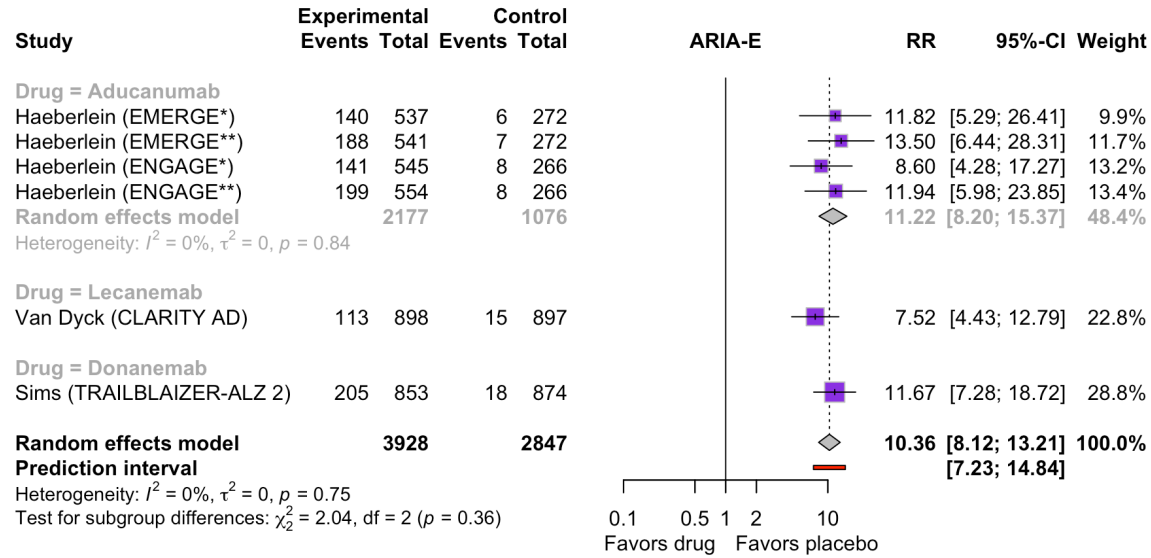

(b)

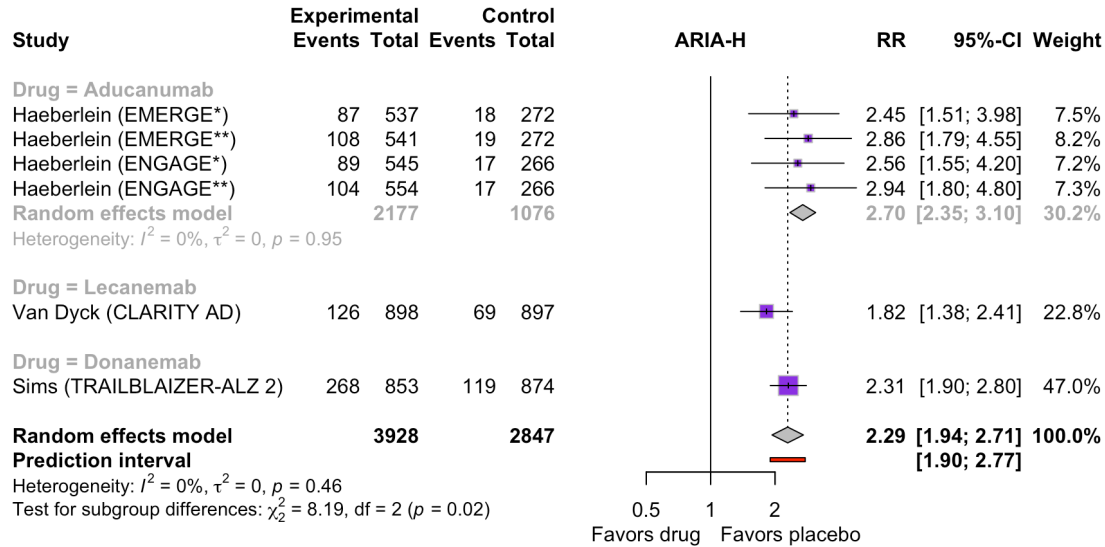

**Figure S16.** Forest plots of (a) Amyloid-Related Imaging Abnormalities with Edema/Effusion (ARIA-E) and (b) ARIA with microhemorrhages or superficial siderosis (ARIA-H) meta-analysis of FDA-approved antibodies only with subgroup analyses by drug

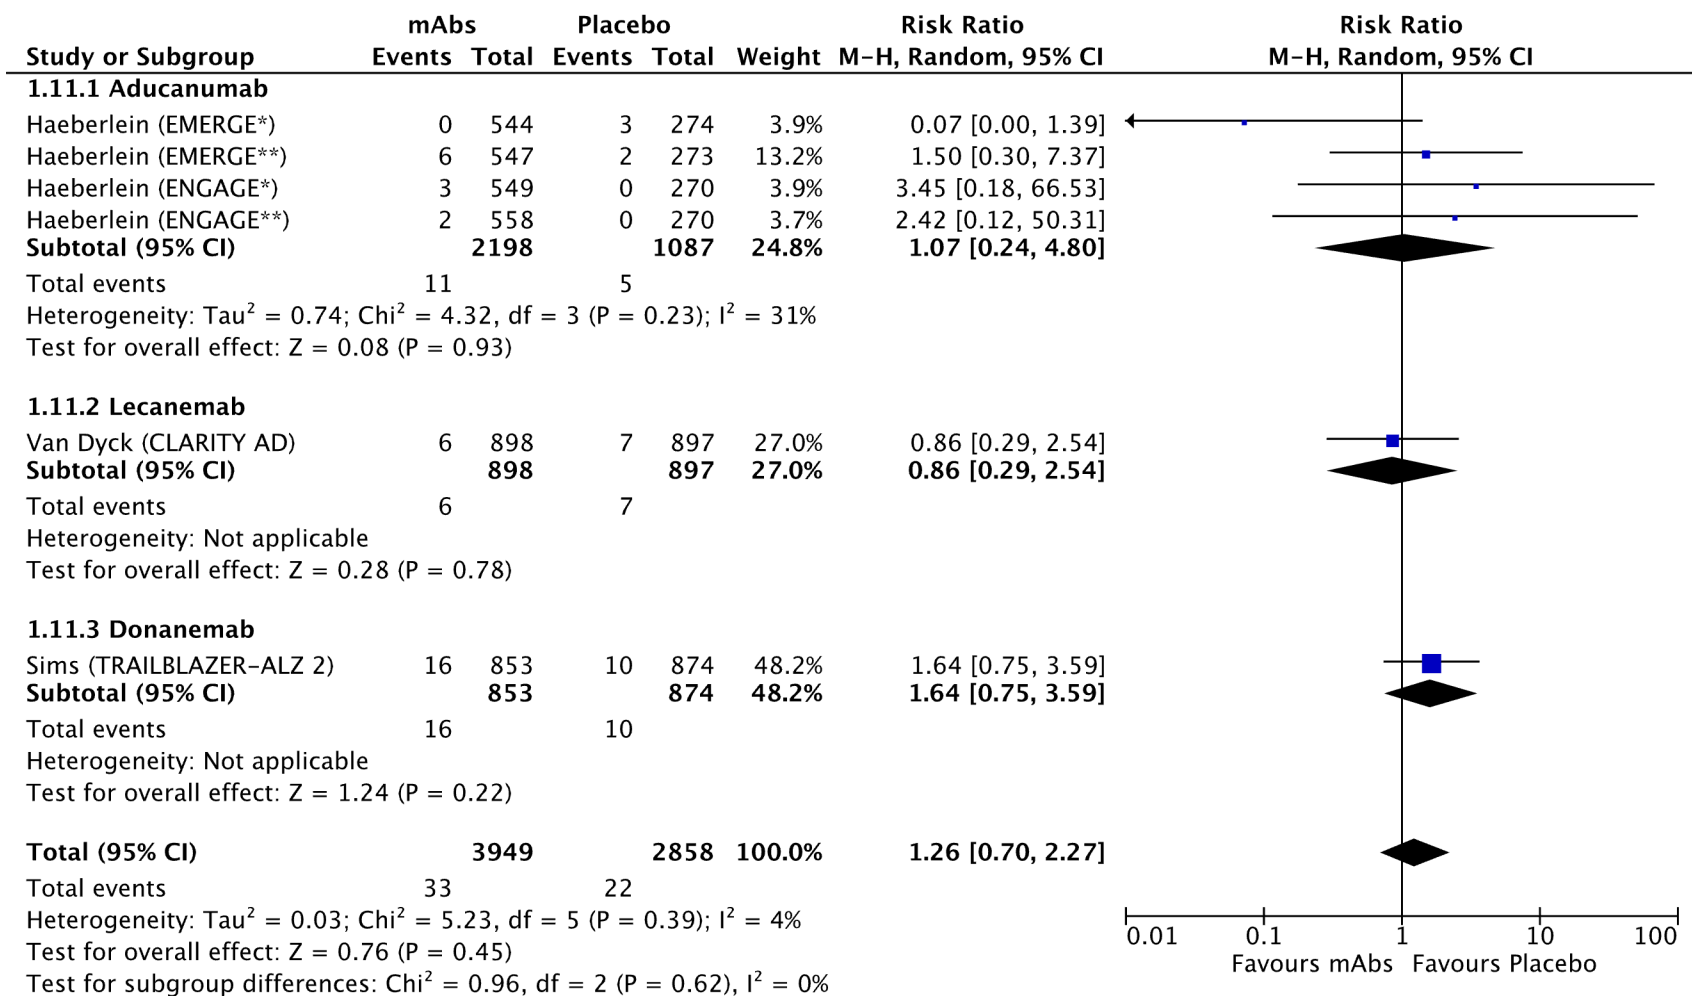

**Figure S17.** Forest plots of all-cause mortality meta-analysis of FDA-approved antibodies only with subgroup analyses by drug
